# Supplementary material for: Asian patients’ perspectives on advance care planning: A mixed-method systematic review and conceptual framework
Source: PubMed Central journal article supplement (PMC8637390; doi:10.1177/02692163211042530), 2021-09-06
Supplement: sj-pdf-1-pmj-10.1177_02692163211042530.pdf [file sj-pdf-1-pmj-10.1177_02692163211042530.pdf]

1 **Appendices**

2 **Appendix 1. Search strategies**

3

4 **Medline Ovid**

5 (exp Advance Directives/ OR Resuscitation Orders/ OR ((Decision Making/ OR Communication/ OR Physician-  
6 Patient Relations/ OR Patient Preference/ OR Personal Autonomy/ OR Knowledge/) AND (Terminal Care/ OR  
7 Palliative Care/ OR Terminally Ill/OR Resuscitation/ OR Life Support Care/ OR Euthanasia/ OR Hospice/)) OR  
8 (((Advance) ADJ3 (plan\* OR directive\*)) OR ((living-will\*)) OR ((decision\* OR decid\* OR plan OR plans OR  
9 planning OR preference\* OR want OR wish\* OR dilemma\* OR refus\* OR choos\* OR choice\* OR communication  
10 OR talking OR disclos\* OR autonom\* OR attitude\* OR practice\* OR perspective\*) ADJ6 (terminal\* OR end of life  
11 OR palliativ\* OR serious\*-ill\* OR severe\*-ill\* OR death OR dying OR advanced\*-cancer\* OR euthanas\* OR  
12 hospice\*)) OR ((do-not OR refus\*) ADJ3 resuscit\*) OR ((decision\* OR decid\* OR plan OR plans OR planning OR  
13 preference\* OR want OR wish\* OR dilemma\* OR refus\* OR choos\* OR choice\* OR communication OR talking  
14 OR disclos\* OR autonom\* OR attitude\* OR practice\* OR perspective\*) ADJ6 life ADJ (saving OR saver\* OR  
15 sustain\* OR resuscit\* OR threat\* OR support\*))).ab,ti.) AND (Asia/ OR exp Asia, Southeastern/ OR exp Far East/  
16 OR Asia, Western/ OR Bangladesh/ OR Bhutan/ OR exp India/ OR Nepal/ OR Pakistan/ OR Sri Lanka/ OR Asian  
17 Continental Ancestry Group/ OR (Asia\* OR Afghan\* OR Bangla\* OR Bhutan\* OR Borne\* OR Brunei\* OR  
18 Cambod\* OR China\* OR Chinese\* OR India OR Indonesia\* OR Japan\* OR Korea\* OR Laos\* OR Laotion\* OR  
19 Malaysia\* OR Mongolia\* OR Myanmar\* OR Birmese\* OR Birma OR Nepal\* OR Pakistan\* OR Papua\* OR  
20 Philippin\* OR Singapore\* OR Sri-Lank\* OR Taiwan\* OR Thailand\* OR Thai OR Timor\* OR Viet-Nam\* OR  
21 VietNam\* OR mekong OR (eastern NOT ((middle OR mediterr\* OR europe) ADJ3 eastern)) OR far-  
22 east).ab,ti,jn,cp.) NOT (exp Emigration and Immigration/ OR exp Tissue Donors/ OR exp Transients and Migrants/  
23 OR exp transplantation/ OR (immigr\* OR migrant\* OR emigra\* OR refugee\* OR donor\* OR donation OR  
24 transplant\* OR chinese american\* OR japanese american\* OR korean american\* OR asian american\*).ab,ti.) NOT  
25 (letter\* OR news OR comment\* OR editorial\* OR congres\* OR abstract\* OR book\* OR chapter\* OR dissertation  
26 abstract\*).pt. AND english.la. NOT (exp child/ NOT exp adult/

17 **Web of science**

18 TS=((((("Advance") NEAR/2 (plan\* OR directive\*)) OR ((living-will\*)) OR ((decision\* OR decid\* OR "plan" OR  
19 "plans" OR "planning" OR preference\* OR "want" OR wish\* OR dilemma\* OR refus\* OR choos\* OR choice\* OR  
20 "communication" OR "talking" OR disclos\* OR autonom\* OR attitude\* OR pratice\* OR perspective\*) NEAR/5  
21 (terminal\* OR "end of life" OR palliativ\* OR serious\*-ill\* OR severe\*-ill\* OR death OR dying OR advanced\*-  
22 cancer\* OR euthanas\* OR hospice\*)) OR (("do-not" OR refus\*) NEAR/2 resuscit\*) OR ((decision\* OR decid\* OR  
23 "plan" OR "plans" OR "planning" OR preference\* OR "want" OR wish\* OR dilemma\* OR refus\* OR choos\* OR  
24 choice\* OR "communication" OR "talking" OR disclos\* OR autonom\* OR attitude\* OR pratice\* OR  
25 perspective\*) NEAR/5 life NEAR/1 (saving OR saver\* OR sustain\* OR resuscit\* OR threat\* OR support\*)))  
26 AND ((Asia\* OR Afghan\* OR Bangla\* OR Bhutan\* OR Borne\* OR Brunei\* OR Cambod\* OR China\* OR  
27 Chinese\* OR India OR Indonesia\* OR Japan\* OR Korea\* OR Laos\* OR Laotion\* OR Malaysia\* OR Mongolia\*  
28 OR Myanmar\* OR Birmese\* OR Birma OR Nepal\* OR Pakistan\* OR Papua\* OR Philippin\* OR Singapore\* OR  
29 Sri-Lank\* OR Taiwan\* OR Thailand\* OR Thai OR Timor\* OR Viet-Nam\* OR VietNam\* OR mekong OR  
30 ("eastern" NOT (("middle" OR mediterr" OR "europe") NEAR/2 "eastern" )) OR far-east)) NOT ((immigr\* OR  
migrant\* OR emigra\* OR refugee\* OR donor\* OR donation OR transplant\* OR "chinese american\*" OR  
"japanese american\*" OR "korean american\*" OR "asian american\*")) NOT (child\* NOT adult\*)

**Embase.com**

( 'living will'/exp OR (( 'patient decision making'/exp OR 'decision making'/de OR 'interpersonal communication'/exp OR 'doctor patient relation'/de OR 'patient information'/de OR 'patient preference'/de OR 'patient autonomy'/de OR 'personal autonomy'/de OR 'patient attitude'/de OR 'knowledge'/exp OR 'personal experience'/de) AND ('terminal care'/exp OR 'palliative therapy'/exp OR 'terminally ill patient'/exp OR 'terminal disease'/de OR 'life threat'/exp OR 'advanced cancer'/de OR resuscitation/de OR 'life sustaining treatment'/de OR euthanasia/de OR hospice/de)) OR (((Advance) NEAR/3 (plan\* OR directive\*)) OR ((living-will\*)) OR ((decision\* OR decid\* OR plan OR plans OR planning OR preference\* OR want OR wish\* OR dilemma\* OR refus\* OR choos\* OR choice\* OR communication OR talking OR disclos\* OR autonom\* OR attitude\* OR practice\* OR perspective\*) NEAR/6 (terminal\* OR 'end of life' OR palliativ\* OR serious\*-ill\* OR severe\*-ill\* OR death OR dying OR advanced\*-cancer\* OR euthanas\* OR hospice\*)) OR ((do-not OR refus\*) NEAR/3 resuscit\*) OR ((decision\* OR decid\* OR plan OR plans OR planning OR preference\* OR want OR wish\* OR dilemma\* OR refus\* OR choos\* OR choice\* OR communication OR talking OR disclos\* OR autonom\* OR attitude\* OR practice\* OR perspective\*) NEAR/6 life NEXT/1 (saving OR saver\* OR sustain\* OR resuscit\* OR threat\* OR support\*)):ab,ti) AND ('Asia'/de OR 'Asian'/de OR 'South Asian'/exp OR 'Southeast Asian'/exp OR 'Far East'/exp OR 'South Asia'/exp OR 'Japanese (people)'/exp OR 'Korean (people)'/exp OR 'Sino-Tibetan people'/exp OR (Asia\* OR Afghan\* OR Bangla\* OR Bhutan\* OR Borne\* OR Brunei\* OR Cambod\* OR China\* OR Chinese\* OR India OR Indonesia\* OR Japan\* OR Korea\* OR Laos\* OR Laotian\* OR Malaysia\* OR Mongolia\* OR Myanmar\* OR Birmese\* OR Birma OR Nepal\* OR Pakistan\* OR Papua\* OR Philippin\* OR Singapore\* OR Sri-Lank\* OR Taiwan\* OR Thailand\* OR Thai OR Timor\* OR Viet-Nam\* OR VietNam\* OR mekong OR (eastern NOT ((middle OR mediterr\* OR europe) NEAR/3 eastern)) OR far-east):ab,ti,ta,cy) NOT ('immigration'/exp OR 'donor'/exp OR 'migrant'/exp OR 'transplantation'/exp OR (immigr\* OR migrant\* OR emigra\* OR refugee\* OR donor\* OR donation OR transplant\* OR 'chinese american\*' OR 'japanese american\*' OR 'korean american\*' OR 'asian american\*'):ab,ti) NOT ([Conference Abstract]/lim OR [Letter]/lim OR [Note]/lim OR [Editorial]/lim) AND [english]/lim NOT (child/exp NOT adult/exp)

**Google scholar (top 200 ranked)**

"living will|wills"|"advance directive|directives"|"advance care planning|plans|plan"  
Asia|China|Chinese|India|Indonesia|Japan|Japanese|Korea -immigration -donor -migrant -transplantation -american

32 **Appendix 2. Description of included studies**

| <b>No.</b> | <b>First author (year)</b>      | <b>Study Design</b>                  | <b>Country or region</b>  | <b>Setting</b>                                        | <b>Subjects</b>                           | <b>Number of participants</b>                                                                                      | <b>Element of ACP being studied</b> | <b>Term related to ACP studied</b>       |
|------------|---------------------------------|--------------------------------------|---------------------------|-------------------------------------------------------|-------------------------------------------|--------------------------------------------------------------------------------------------------------------------|-------------------------------------|------------------------------------------|
| 1.         | Voltz R (1998) <sup>26(a)</sup> | Cross sectional survey               | Japan                     | Hospice or palliative care unit in hospital           | Patients with terminal illness            | 34 (out of 252). Other participants: American and German patients and healthcare professionals from US and Germany | Discussion, documentation           | Advance directive; end-of-life decision  |
| 2.         | Htut Y (2007) <sup>57</sup>     | In-depth (semi-structured) interview | Malaysia                  | Hospitals (4 outpatient clinic and 11 inpatient ward) | Elderly patients                          | 15                                                                                                                 | Discussion, documentation           | Advance care planning, advance directive |
| 3.         | Lee J (2010) <sup>32</sup>      | Cross sectional survey               | South Korea               | Hospital                                              | Patients with advanced lung cancer        | 30 patients (out of 124 participants). Other participants: family members, physicians, nurses                      | Documentation                       | Advance directive                        |
| 4.         | Chu LW (2011) <sup>39</sup>     | Cross-sectional survey               | Hong Kong                 | Long-term care facilities                             | Elders living in long-term care facility  | 1600                                                                                                               | Documentation                       | Advance directive                        |
| 5.         | Ting FH (2011) <sup>37</sup>    | Cross sectional survey               | Hong Kong                 | Hospital (inpatient, acute wards)                     | Elderly in-patients with chronic diseases | 219                                                                                                                | Documentation                       | Advance directive                        |
| 6.         | Ivo K (2012) <sup>24</sup>      | Cross-sectional survey               | South Korea, Japan, China | Hospital                                              | Seriously-ill patients with cancer        | 205: 91 (South Korea); 52 (Japan); 62 (China)                                                                      | Documentation                       | Advance directive                        |
| 7.         | Keam B (2013) <sup>34</sup>     | Cross-sectional survey               | South Korea               | Hospital                                              | Patients with cancer (any stage)          | 1242 (out of 3840). Other participants: family caregivers, oncologists, and general public                         | Documentation                       | Advance directive                        |

| No. | First author (year)              | Study Design             | Country or region | Setting                                   | Subjects                                  | Number of participants                                      | Element of ACP being studied | Term related to ACP studied |
|-----|----------------------------------|--------------------------|-------------------|-------------------------------------------|-------------------------------------------|-------------------------------------------------------------|------------------------------|-----------------------------|
| 8.  | Ni P (2014) <sup>56</sup>        | Cross-sectional survey   | China             | Long-term care facilities                 | Elders living in long-term care facility  | 467                                                         | Documentation                | Advance directive           |
| 9.  | Cheong K (2015) <sup>44</sup>    | Mixed method             | Singapore         | Hospital                                  | Patients with early cognitive impairment  | 93                                                          | Discussion                   | Advance care planning       |
| 10. | Park SY (2015) <sup>31</sup>     | Cross sectional survey   | South Korea       | Long-term care facilities                 | Elders living in long-term care facility  | 150 (out of 300). Other participants: elders living at home | Discussion, documentation    | DNR decision, DNR order     |
| 11. | Hing Wong A (2016) <sup>54</sup> | Pre and post-test survey | Malaysia          | Hospital                                  | Patients on routine hemodialysis          | 58                                                          | Discussion                   | Advance care planning       |
| 12. | Hui EC (2016) <sup>38</sup>      | Cross-sectional survey   | Hong Kong         | Hospital                                  | Patients with solid cancer (any stage)    | 288 (149 palliative and 139 non-palliative)                 | Documentation                | Advance directive           |
| 13. | Lee HTS (2016) <sup>50</sup>     | In-depth interview       | Taiwan            | Long-term care facilities                 | Elders living in long-term care facility  | 11                                                          | Documentation                | DNR directive               |
| 14. | Park J (2016) <sup>35</sup>      | Cross-sectional survey   | South Korea       | Community centers and nursing homes       | Elders living in long-term care facility  | 156                                                         | Documentation                | Advance directive           |
| 15. | Zhang Q (2016) <sup>52</sup>     | Cross sectional survey   | China             | Cancer center hospital (inpatient wards)  | In-patients with solid cancer (any stage) | 209 (out of 424). Other participants: family caregivers     | Documentation                | Advance directive           |
| 16. | Zheng RJ (2016) <sup>51</sup>    | Cross-sectional survey   | China             | Cancer center hospitals (inpatient wards) | In-patients with solid cancer (any stage) | 526                                                         | Documentation                | Advance directive           |

| <b>No.</b> | <b>First author (year)</b>      | <b>Study Design</b>                           | <b>Country or region</b> | <b>Setting</b>                             | <b>Subjects</b>                                | <b>Number of participants</b>                                                                      | <b>Element of ACP being studied</b> | <b>Term related to ACP studied</b>                   |
|------------|---------------------------------|-----------------------------------------------|--------------------------|--------------------------------------------|------------------------------------------------|----------------------------------------------------------------------------------------------------|-------------------------------------|------------------------------------------------------|
| 17.        | Hirakawa Y (2017) <sup>25</sup> | Semi-structured interview                     | Japan                    | Home care support                          | Elders requiring home care services            | 102                                                                                                | Discussion                          | End-of-life care decision                            |
| 18.        | Koh SJ (2017) <sup>29</sup>     | Focus group interview                         | South Korea              | General hospital (inpatient wards)         | Elderly inpatients with major diseases         | 12 (out of 28). Other participants: family caregivers                                              | Discussion, documentation           | Advance care planning, advance directive             |
| 19.        | Lo TJ (2017) <sup>43</sup>      | Mixed-method                                  | Singapore                | Hospital                                   | Patients with early cognitive impairment       | 158                                                                                                | Discussion                          | Advance care planning                                |
| 20.        | Sung HC (2017) <sup>49</sup>    | Quasi-experimental                            | Taiwan                   | Long-term care facilities                  | Elders living in long-term care facility       | 57 (29 experimental and 28 control group)                                                          | Discussion                          | Advance care planning                                |
| 21.        | Hou XT (2018) <sup>55</sup>     | Cross sectional survey                        | China                    | Cancer hospital                            | Patients with advanced cancer                  | 264                                                                                                | Discussion                          | Advance care planning                                |
| 22.        | Menon S, 2018 <sup>42(a)</sup>  | Focus group and individual in-depth interview | Singapore                | Geriatrics or family medicine institutions | Patients with life-limiting illness            | 15 (out of 61). Other participants: family caregivers and healthcare professionals                 | Discussion                          | Advance care planning                                |
| 23.        | An HJ (2019) <sup>30</sup>      | Cross sectional survey                        | South Korea              | General hospitals                          | Patients with terminal cancer                  | 336                                                                                                | Discussion, documentation           | End-of-life decision-making, POLST                   |
| 24.        | Chan CWH (2019) <sup>40</sup>   | Semi-structured interview                     | Hong Kong                | Hospital                                   | Patients with life-limiting illness            | 24 (out of 96). Other participants: healthcare professionals, patient's family members, volunteers | Discussion, documentation           | Advance directive, AD-decision-making, AD discussion |
| 25.        | Cheng HB (2019) <sup>36</sup>   | Mixed-method                                  | Hong Kong                | Palliative care clinic                     | Patients with non-cancer life limiting illness | 119                                                                                                | Discussion, documentation           | Advance directive, end-of-life decision-making       |

| No. | First author (year)             | Study Design                                         | Country or region | Setting                       | Subjects                                 | Number of participants                                                                    | Element of ACP being studied | Term related to ACP studied              |
|-----|---------------------------------|------------------------------------------------------|-------------------|-------------------------------|------------------------------------------|-------------------------------------------------------------------------------------------|------------------------------|------------------------------------------|
| 26. | Kim JW (2019) <sup>28</sup>     | Cross-sectional survey                               | South Korea       | Cancer center hospital        | Patients with advanced solid cancer      | 101                                                                                       | Documentation                | POLST                                    |
| 27. | Lin CP (2019) <sup>47</sup>     | Semi-structured qualitative interview                | Taiwan            | Oncology unit                 | Patients with advanced cancer            | 15 (out of 45). Other participants: family caregivers, healthcare professionals           | Discussion                   | Advance care planning                    |
| 28. | Lee HTS (2019) <sup>48</sup>    | Qualitative study (Action research)                  | Taiwan            | Long-term care facilities     | Elders living in long-term care facility | 10 (out of 34). Other participants: family, medical staff                                 | Discussion                   | Advance care planning                    |
| 29. | Park HY (2019) <sup>33</sup>    | Cross sectional survey                               | South Korea       | Hospital (outpatient clinic)  | Patients with cancer (any stage)         | 1001 (out of 4176). Other participants: family caregivers, physicians, and general public | Discussion, documentation    | Advance care planning, advance directive |
| 30. | Cheung JTK (2020) <sup>41</sup> | Focus group and individual semi-structured interview | Hong Kong         | Palliative day care center    | Patients with serious illness            | 17 (out of 30). Other participants: family caregivers                                     | Discussion                   | Advance care planning                    |
| 31. | Chou HH (2020) <sup>46</sup>    | Cross-sectional survey                               | Taiwan            | Hospital (Neurology clinic)   | Patients with early cognitive impairment | 260                                                                                       | Documentation                | Advance directive                        |
| 32. | Feng C (2020) <sup>53</sup>     | Cross-sectional survey                               | China             | Hospital outpatient clinic    | Patients with lung cancer (any stage)    | 148 (out of 297). Other participants: family caregivers                                   | Documentation                | Advance directive                        |
| 33. | Jiao NX (2020) <sup>58</sup>    | Semi-structured interview                            | Malaysia          | Long-term care facility       | Elders living in long-term care facility | 13                                                                                        | Discussion                   | End-of-life communication                |
| 34. | Kizawa Y(2020) <sup>23</sup>    | Pilot randomized controlled trial                    | Japan             | No restriction on the setting | Elderly patients with chronic disease    | 220                                                                                       | Discussion                   | Advance care planning                    |

| No. | First author (year)         | Study Design             | Country or region | Setting            | Subjects                                               | Number of participants                                                          | Element of ACP being studied | Term related to ACP studied |
|-----|-----------------------------|--------------------------|-------------------|--------------------|--------------------------------------------------------|---------------------------------------------------------------------------------|------------------------------|-----------------------------|
| 35. | Lin CP (2020) <sup>45</sup> | Mixed-method             | Taiwan            | Hospital           | Patients with advanced cancer                          | 10 (out of 29). Other participants: family members and healthcare professionals | Discussion                   | Advance care planning       |
| 36. | Yoo SH (2020) <sup>27</sup> | Prospective cohort study | South Korea       | Academic hospitals | Patients with advanced solid and/or hematologic cancer | 150: (out of 251). Other participants: family caregivers                        | Discussion, documentation    | Advance directive, POLST    |

33 ACP: advance care planning; AD: advance directive; DNR: do-not-resuscitate; POLST: physician orders for life-sustaining treatment

34 <sup>(a)</sup>Studies including participants other than patients

35 <sup>(b)</sup>Multi-country study: US, Germany, Japan

36

37 **Appendix 3. Quality assessment scores for included quantitative and mixed-method studies**

38

|     | Author<br>(Reference)     | Objective | Study design | Subject selection | Subject characteristics | Random allocation | Blinding of investigator | Blinding of subjects | Outcome measures | Sample size | Analytic method | Estimate of variance | Control for confounding | Result | Conclusion | Total Sum | Summary score | Quality               |
|-----|---------------------------|-----------|--------------|-------------------|-------------------------|-------------------|--------------------------|----------------------|------------------|-------------|-----------------|----------------------|-------------------------|--------|------------|-----------|---------------|-----------------------|
| 1.  | Voltz R <sup>26</sup>     | 2         | 1            | 1                 | 1                       | N/A               | N/A                      | N/A                  | 1                | 1           | 1               | 1                    | N/A                     | 1      | 0          | 10        | 0.50          | Low                   |
| 2.  | Lee J <sup>32</sup>       | 2         | 2            | 1                 | 2                       | N/A               | N/A                      | N/A                  | 2                | 2           | 1               | 1                    | 0                       | 2      | 2          | 17        | 0.77          | Good                  |
| 3.  | Chu LW <sup>39</sup>      | 2         | 2            | 2                 | 2                       | N/A               | N/A                      | N/A                  | 2                | 2           | 2               | 2                    | N/A                     | 2      | 2          | 20        | 1.00          | Strong                |
| 4.  | Ting FH <sup>37</sup>     | 2         | 2            | 2                 | 2                       | N/A               | N/A                      | N/A                  | 2                | 2           | 1               | 2                    | N/A                     | 2      | 2          | 19        | 0.95          | Strong                |
| 5.  | Ivo K <sup>24</sup>       | 2         | 2            | 1                 | 1                       | N/A               | N/A                      | N/A                  | 2                | 1           | 1               | 1                    | 0                       | 2      | 2          | 13        | 0.59          | Adequate              |
| 6.  | Keam B <sup>34</sup>      | 2         | 2            | 2                 | 1                       | N/A               | N/A                      | N/A                  | 2                | 2           | 2               | 2                    | 2                       | 2      | 2          | 21        | 0.95          | Strong                |
| 7.  | Ni P <sup>56</sup>        | 2         | 2            | 2                 | 2                       | N/A               | N/A                      | N/A                  | 2                | 1           | 2               | 2                    | N/A                     | 2      | 2          | 19        | 0.95          | Strong                |
| 8.  | Cheong K <sup>44*</sup>   | 2         | 1            | 1                 | 2                       | N/A               | N/A                      | N/A                  | 1                | 0           | 1               | 1                    | 0                       | 1      | 1          | 11        | 0.50          | Adequate <sup>a</sup> |
| 9.  | Park SY <sup>31</sup>     | 2         | 2            | 2                 | 2                       | N/A               | N/A                      | N/A                  | 1                | 2           | 2               | 0                    | 0                       | 2      | 1          | 16        | 0.73          | Good                  |
| 10. | Hing Wong A <sup>54</sup> | 2         | 1            | 1                 | 1                       | N/A               | N/A                      | N/A                  | 1                | 0           | 2               | 0                    | N/A                     | 2      | 2          | 12        | 0.60          | Adequate              |
| 11. | Hui EC <sup>38</sup>      | 1         | 1            | 1                 | 1                       | N/A               | N/A                      | N/A                  | 1                | 1           | 2               | 1                    | 0                       | 2      | 1          | 12        | 0.55          | Adequate              |
| 12. | Park J <sup>35</sup>      | 2         | 2            | 1                 | 1                       | N/A               | N/A                      | N/A                  | 1                | 1           | 2               | 2                    | N/A                     | 1      | 2          | 15        | 0.75          | Good                  |
| 13. | Zhang Q <sup>52</sup>     | 2         | 2            | 1                 | 2                       | N/A               | N/A                      | N/A                  | 2                | 0           | 2               | 2                    | N/A                     | 1      | 2          | 16        | 0.80          | Good                  |
| 14. | Zheng RJ <sup>51</sup>    | 2         | 2            | 2                 | 2                       | N/A               | N/A                      | N/A                  | 1                | 0           | 2               | 2                    | N/A                     | 1      | 2          | 16        | 0.80          | Good                  |
| 15. | Lo TJ <sup>43*</sup>      | 2         | 1            | 2                 | 2                       | N/A               | N/A                      | N/A                  | 1                | 1           | 1               | 1                    | N/A                     | 1      | 2          | 14        | 0.68          | Adequate <sup>a</sup> |



|     | Author<br>(Reference)  | Objective | Study design | Subject selection | Subject characteristics | Random allocation | Blinding of investigator | Blinding of subjects | Outcome measures | Sample size | Analytic method | Estimate of variance | Control for confounding | Result | Conclusion | Total Sum | Summary score | Quality             |
|-----|------------------------|-----------|--------------|-------------------|-------------------------|-------------------|--------------------------|----------------------|------------------|-------------|-----------------|----------------------|-------------------------|--------|------------|-----------|---------------|---------------------|
| 16. | Sung HC <sup>49</sup>  | 2         | 2            | 1                 | 2                       | 0                 | 0                        | N/A                  | 2                | 1           | 2               | 1                    | 0                       | 2      | 2          | 17        | 0.65          | Adequate            |
| 17. | Hou XT <sup>55</sup>   | 2         | 1            | 1                 | 2                       | N/A               | N/A                      | N/A                  | 1                | 0           | 2               | 1                    | N/A                     | 2      | 1          | 13        | 0.75          | Good                |
| 18. | An HJ <sup>30</sup>    | 2         | 1            | 1                 | 2                       | N/A               | N/A                      | N/A                  | 2                | 1           | 1               | 0                    | N/A                     | 1      | 1          | 12        | 0.60          | Adequate            |
| 19. | Cheng HB <sup>36</sup> | 2         | 1            | 1                 | 1                       | N/A               | N/A                      | N/A                  | 2                | 1           | 2               | 1                    | N/A                     | 2      | 2          | 16        | 0.8           | Good <sup>a</sup>   |
| 20. | Kim JW <sup>28</sup>   | 2         | 2            | 1                 | 2                       | N/A               | N/A                      | N/A                  | 1                | 1           | 2               | 1                    | 0                       | 2      | 2          | 16        | 0.73          | Good                |
| 21. | Park HY <sup>33</sup>  | 2         | 2            | 2                 | 2                       | N/A               | N/A                      | N/A                  | 2                | 2           | 2               | 2                    | 2                       | 2      | 2          | 22        | 1.00          | Strong              |
| 22. | Chou HH <sup>46</sup>  | 2         | 2            | 1                 | 1                       | N/A               | N/A                      | N/A                  | 1                | 1           | 1               | 1                    | 1                       | 1      | 1          | 13        | 0.50          | Low                 |
| 23. | Feng C <sup>53</sup>   | 1         | 2            | 0                 | 2                       | N/A               | N/A                      | N/A                  | 1                | 1           | 2               | 0                    | N/A                     | 1      | 2          | 12        | 0.6           | Adequate            |
| 24. | Kizawa Y <sup>23</sup> | 2         | 2            | 2                 | 1                       | 1                 | 1                        | 0                    | 1                | 2           | 2               | 2                    | 1                       | 2      | 2          | 21        | 0.75          | Good                |
| 25. | Lin CP <sup>45*</sup>  | 2         | 2            | 2                 | 1                       | N/A               | N/A                      | N/A                  | 2                | 1           | 2               | 2                    | N/A                     | 2      | 2          | 18        | 0.93          | Strong <sup>a</sup> |
| 26. | Yoo SH <sup>27</sup>   | 2         | 2            | 1                 | 2                       | N/A               | N/A                      | N/A                  | 1                | 1           | 2               | 2                    | N/A                     | 2      | 2          | 17        | 0.85          | Strong              |

39 N/A: not applicable.

40 <sup>a</sup>Mixed-method study: summary score is the sum of quality assessment scores for qualitative and quantitative divided by two.

41

42

43 **Appendix 4. Quality assessment scores for included qualitative and mixed-method studies**

44

|     | <b>Author<br/>(Reference)</b> | <b>Objective</b> | <b>Study design</b> | <b>Context of the study</b> | <b>Theoretical framework</b> | <b>Sampling strategy</b> | <b>Data collection</b> | <b>Data analysis</b> | <b>Verification procedure</b> | <b>Result and conclusion</b> | <b>Reflexivity of the account</b> | <b>Total sum</b> | <b>Summary Score</b> | <b>Quality</b>        |
|-----|-------------------------------|------------------|---------------------|-----------------------------|------------------------------|--------------------------|------------------------|----------------------|-------------------------------|------------------------------|-----------------------------------|------------------|----------------------|-----------------------|
| 1.  | Htut Y <sup>57</sup>          | 2                | 2                   | 2                           | 0                            | 1                        | 2                      | 1                    | 2                             | 2                            | 0                                 | 14               | 0.70                 | Adequate              |
| 2.  | Cheong K <sup>44*</sup>       | 2                | 1                   | 2                           | 1                            | 2                        | 1                      | 2                    | 2                             | 2                            | 0                                 | 15               | 0.75                 | Adequate <sup>a</sup> |
| 3.  | Lee HTS <sup>50</sup>         | 2                | 2                   | 2                           | 1                            | 2                        | 2                      | 2                    | 2                             | 2                            | 2                                 | 19               | 0.95                 | Strong                |
| 4.  | Hirakawa Y <sup>25</sup>      | 2                | 2                   | 2                           | 1                            | 1                        | 2                      | 2                    | 2                             | 2                            | 0                                 | 16               | 0.80                 | Good                  |
| 5.  | Koh SJ <sup>29</sup>          | 1                | 2                   | 2                           | 1                            | 1                        | 2                      | 2                    | 0                             | 1                            | 0                                 | 12               | 0.60                 | Adequate              |
| 6.  | Lo TJ <sup>43*</sup>          | 2                | 1                   | 2                           | 1                            | 1                        | 1                      | 2                    | 2                             | 1                            | 0                                 | 13               | 0.68                 | Adequate <sup>a</sup> |
| 7.  | Menon S <sup>42</sup>         | 2                | 2                   | 2                           | 1                            | 2                        | 2                      | 2                    | 2                             | 2                            | 0                                 | 17               | 0.85                 | Strong                |
| 8.  | Chan CWH <sup>40</sup>        | 2                | 2                   | 1                           | 1                            | 2                        | 0                      | 1                    | 0                             | 2                            | 0                                 | 11               | 0.55                 | Adequate              |
| 9.  | Cheng HB <sup>36</sup>        | 2                | 1                   | 2                           | 0                            | 1                        | 2                      | 0                    | 0                             | 2                            | 0                                 | 10               | 0.8                  | Good <sup>a</sup>     |
| 10. | Lin CP <sup>47</sup>          | 2                | 2                   | 2                           | 1                            | 2                        | 2                      | 2                    | 2                             | 2                            | 1                                 | 18               | 0.90                 | Strong                |
| 11. | Lee HTS <sup>48</sup>         | 2                | 2                   | 2                           | 2                            | 2                        | 2                      | 2                    | 2                             | 2                            | 0                                 | 18               | 0.90                 | Strong                |
| 12. | Cheung JTK <sup>41</sup>      | 2                | 1                   | 2                           | 1                            | 2                        | 2                      | 2                    | 2                             | 2                            | 0                                 | 16               | 0.80                 | Good                  |
| 13. | Jiao NX <sup>58</sup>         | 2                | 2                   | 2                           | 0                            | 1                        | 1                      | 1                    | 2                             | 2                            | 0                                 | 13               | 0.65                 | Adequate              |
| 14. | Lin CP <sup>45*</sup>         | 2                | 2                   | 2                           | 2                            | 1                        | 2                      | 2                    | 2                             | 2                            | 2                                 | 19               | 0.95                 | Strong <sup>a</sup>   |

45 N/A: not applicable.

46 <sup>a</sup>Mixed-method study: summary score is the sum of quality assessment scores for qualitative and quantitative divided by two.

47 **Appendix 5. Asian patients' agreement with the importance of advance directive**

| No | First author              | Year | Country/Region            | Type of patients                          | Asian patients' perspectives on their agreement with importance of advance directives | Percentage                               |
|----|---------------------------|------|---------------------------|-------------------------------------------|---------------------------------------------------------------------------------------|------------------------------------------|
| 1. | Ivo K <sup>24</sup>       | 2012 | South Korea, China, Japan | Seriously-ill patients with cancer        | Agree with the importance of AD                                                       | South Korea: 85%; China: 80%; Japan: 96% |
| 2. | Park SY <sup>31</sup>     | 2015 | South Korea               | Elders living in long-term care facility  | Agree with the potential importance of DNR order                                      | 87%                                      |
| 3. | Keam B <sup>34</sup>      | 2013 | South Korean              | Patients with cancer (any stage)          | Agree with the importance of AD                                                       | 93%                                      |
| 4. | Hing Wong A <sup>54</sup> | 2016 | Malaysia                  | Patients on routine hemodialysis          | Agree with the importance of AD                                                       | 75%                                      |
| 5. | Zhang Q <sup>52</sup>     | 2016 | China                     | Patients with cancer                      | Agree with the importance of AD<br>Disagree with the importance of AD                 | 74%<br>26%                               |
| 6. | Zheng RJ <sup>51</sup>    | 2016 | China                     | In-patients with solid cancer (any stage) | Agree with the importance of AD<br>Disagree with the importance of AD                 | 22%<br>78%                               |
| 7. | Chou HH <sup>46</sup>     | 2020 | Taiwan                    | Patients with early cognitive impairment  | Agree with the importance of AD                                                       | 77%                                      |

48 AD: advance directive; DNR: do-not-resuscitate.

49 **Appendix 6. Patients' perspectives on the decision maker in advance care planning**

| No | First author          | Year | Country                   | Type of patient                            | Patients' perspectives on decision maker in ACP                                                                                                              | Major findings                                                                                                                                                                                                                                                                                 |
|----|-----------------------|------|---------------------------|--------------------------------------------|--------------------------------------------------------------------------------------------------------------------------------------------------------------|------------------------------------------------------------------------------------------------------------------------------------------------------------------------------------------------------------------------------------------------------------------------------------------------|
| 1. | Voltz R <sup>26</sup> | 1998 | Japan                     | Patients with terminal illness             | Family                                                                                                                                                       | 29%                                                                                                                                                                                                                                                                                            |
| 2. | Lee J <sup>32</sup>   | 2010 | South Korea               | Patients with advanced lung cancer         | a) Patient<br>b) Patient and family<br>c) Family                                                                                                             | a) 27%<br>b) 63%<br>c) 10%                                                                                                                                                                                                                                                                     |
| 3. | Ting FH <sup>37</sup> | 2011 | Hong Kong                 | Elderly in-patients with chronic diseases  | a) Patient<br>a) Patient, family, and physician                                                                                                              | a) 55%<br>a) 14%                                                                                                                                                                                                                                                                               |
| 4. | Ivo K <sup>24</sup>   | 2012 | South Korea, China, Japan | Seriously-ill patients with cancer         | b) Patient<br>c) Patient and family<br>d) Patient and physician<br>e) Patient, family, and physician<br>f) Family<br>g) Physician                            | b) 27% (South Korea); 26% (China); 33% (Japan)<br>c) 40% (South Korea); 37% (China); 49% (Japan)<br>d) 6% (South Korea); 11% (China); 8% (Japan)<br>e) 21% (South Korea); 0 (China); 4% (Japan)<br>f) 3% (South Korea); 18% (China); 4% (Japan)<br>g) 2% (South Korea); 8% (China); 2% (Japan) |
| 5. | Park SY <sup>31</sup> | 2015 | South Korea               | Elders living in a long-term care facility | a) Patient<br>b) Patient and family<br>c) Family and physician<br>d) Other                                                                                   | a) 39%<br>b) 32%<br>c) 25%<br>d) 4%                                                                                                                                                                                                                                                            |
| 6. | Hui EC <sup>38</sup>  | 2017 | Hong Kong                 | Patients with solid cancer (any stage)     | a) Patient<br>b) Patient and family<br>c) Patient and physician<br>d) Patient, family, and physician<br>e) Family and physician<br>f) Physician<br>g) Family | a) 21%<br>b) 13%<br>c) 3%<br>d) 55%<br>e) 3%<br>f) 4%<br>g) 1%                                                                                                                                                                                                                                 |

|    |                      |      |             |                                     |                                         |                            |
|----|----------------------|------|-------------|-------------------------------------|-----------------------------------------|----------------------------|
| 7. | Kim JW <sup>28</sup> | 2020 | South Korea | Patients with advanced solid cancer | a) Patient<br>b) Family<br>c) Physician | a) 51%<br>b) 21%<br>c) 18% |
|----|----------------------|------|-------------|-------------------------------------|-----------------------------------------|----------------------------|

50 ACP: advance care planning.

51

52 **Appendix 7. Underlying motives for patients' willingness or unwillingness to engage in ACP (Quantitative data)**

| No | First author          | Year | Country     | Type of patient                           | Motives for patient's willingness to engage in ACP                                                                                                                                                                                                                                                                                                                                                                                                                                                                                                                    | Percentage                                                               |
|----|-----------------------|------|-------------|-------------------------------------------|-----------------------------------------------------------------------------------------------------------------------------------------------------------------------------------------------------------------------------------------------------------------------------------------------------------------------------------------------------------------------------------------------------------------------------------------------------------------------------------------------------------------------------------------------------------------------|--------------------------------------------------------------------------|
| 1. | Ting FH <sup>37</sup> | 2011 | Hong Kong   | Elderly in-patients with chronic diseases | a) Patients' belief that ACP would ensure comfortable end-of-life<br>b) Patients' belief that ACP would avoid causing burden to the family<br>c) Patients' belief that ACP would ensure their wishes will be respected<br>d) Patients' belief that ACP would prevent conflict between family members<br>e) Patients' experience with the death of a relative/friend<br>f) Patients' belief that ACP would avoid causing burden to the society<br>g) Patients' belief that quality of life is more important than the length of life<br>h) Patients' religious beliefs | a) 71%<br>b) 39%<br>c) 35%<br>d) 14%<br>e) 9%<br>f) 8%<br>g) 8%<br>h) 4% |
| 2. | Ni P <sup>56</sup>    | 2014 | China       | Elders living in long-term care facility  | a) Patients' wish to make AD when they are still cognitively intact<br>b) Patients' wish that ACP would help the family understand their wishes at an early stage                                                                                                                                                                                                                                                                                                                                                                                                     | a) 44%<br>b) 39%                                                         |
| 3. | Park J <sup>35</sup>  | 2016 | South Korea | Elders living in long-term care facility  | a) Patients wish to avoid causing a burden to the family with end-of-life decisions<br>b) Patients' wish to decide for themselves<br>c) Patients' belief of the possibility of incapacity due to their illness                                                                                                                                                                                                                                                                                                                                                        | a) 61%<br>b) 61%<br>c) 54%                                               |
| 4. | Kim JW <sup>28</sup>  | 2020 | South Korea | Patients with advanced solid cancer       | a) Patients' wish to exercise self-determination<br>b) Patients' wish to follow physician's recommendation<br>c) Patients' belief that ACP would prevent them from suffering due to meaningless treatment<br>d) Patients' wish to ease the economic burden on the family                                                                                                                                                                                                                                                                                              | a) 39%<br>b) 35%<br>c) 26%<br>d) 13%                                     |
| No | First author          | Year | Country     | Type of patient                           | Motives for patient's unwillingness to engage in ACP                                                                                                                                                                                                                                                                                                                                                                                                                                                                                                                  | Percentage                                                               |

|   |                       |      |             |                                            |                                                                                                                                                                                                                                                                                                                                                                                                                                                                                                                                                                              |                                                                                                                                                          |
|---|-----------------------|------|-------------|--------------------------------------------|------------------------------------------------------------------------------------------------------------------------------------------------------------------------------------------------------------------------------------------------------------------------------------------------------------------------------------------------------------------------------------------------------------------------------------------------------------------------------------------------------------------------------------------------------------------------------|----------------------------------------------------------------------------------------------------------------------------------------------------------|
| 1 | Ting FH <sup>37</sup> | 2011 | Hong Kong   | Elderly in-patients with chronic diseases  | <ul style="list-style-type: none"> <li>a) Patients' wish to entrust decision-making to the relatives</li> <li>b) Patients' belief to let nature take its course</li> <li>c) Patients' belief that there is no need to think about drafting an AD now</li> <li>d) Patients' wish to entrust decision-making to the physicians</li> <li>e) Patients' belief that they may want to change their decision later</li> <li>f) Patients' belief that they are not familiar with the concept of AD</li> <li>g) Patients' religious beliefs</li> </ul>                                | <ul style="list-style-type: none"> <li>a) 39%</li> <li>b) 25%</li> <li>c) 23%</li> <li>d) 13%</li> <li>e) 3%</li> <li>f) 3%</li> <li>g) 2%</li> </ul>    |
| 2 | Ni P <sup>56</sup>    | 2014 | China       | Elders living in a long-term care facility | <ul style="list-style-type: none"> <li>a) Patients' lack of awareness about AD</li> <li>b) Patients' wish to entrust decision-making to the family</li> <li>c) Patients' belief that ACP is not useful even when it is completed</li> <li>d) Patients' belief that it is too early for ACP</li> </ul>                                                                                                                                                                                                                                                                        | <ul style="list-style-type: none"> <li>a) 66%</li> <li>b) 23%</li> <li>c) 6%</li> <li>d) 3%</li> </ul>                                                   |
| 3 | Park J <sup>35</sup>  | 2016 | South Korea | Elders living in a long-term care facility | <ul style="list-style-type: none"> <li>a) Patients' wish to entrust decision-making to the family</li> <li>b) Patients' wish to entrust decision-making to the physician</li> <li>c) Patients' belief that ACP is not necessary for their current age</li> <li>d) Patients' lack of knowledge regarding ADs</li> </ul>                                                                                                                                                                                                                                                       | <ul style="list-style-type: none"> <li>a) 67%</li> <li>b) 60%</li> <li>c) 44%</li> <li>d) 30%</li> </ul>                                                 |
| 4 | Hui EC <sup>38</sup>  | 2017 | Hong Kong   | Patients with solid cancer (any stage)     | <ul style="list-style-type: none"> <li>a) Patients' belief that it is difficult to make such medical decisions before it happens</li> <li>b) Patients' belief that they need more information and time for ACP</li> <li>c) Patients' wish to entrust decision-making to the family</li> </ul>                                                                                                                                                                                                                                                                                | <ul style="list-style-type: none"> <li>a) 72%</li> <li>b) 55%</li> <li>c) 53%</li> </ul>                                                                 |
| 5 | Hou XT <sup>55</sup>  | 2018 | China       | Patients with advanced cancer              | <ul style="list-style-type: none"> <li>a) Patients' wish to entrust decision-making to the relatives</li> <li>b) Patients' wish to entrust decision-making to their physicians</li> <li>c) Patients' belief that talking about ACP would make their relatives sad</li> <li>d) Patients' belief that talking about ACP would make them sad</li> <li>e) Patients' belief that they do not have enough information needed for decision-making</li> <li>f) Patients' belief that they have a lack of understanding of how to approach end-of-life communication</li> </ul>       | <ul style="list-style-type: none"> <li>a) 31%</li> <li>b) 29%</li> <li>c) 23%</li> <li>d) 19%</li> <li>e) 19%</li> <li>f) 17%</li> </ul>                 |
| 6 | An HJ <sup>30</sup>   | 2019 | South Korea | Patients with terminal cancer              | <ul style="list-style-type: none"> <li>a) Patients' belief that they have lack knowledge about AD</li> <li>b) Patients' belief that drafting AD would mean giving up or result in being abandoned by the physicians</li> <li>c) Patients' belief that signing AD would lead to bad things</li> <li>d) Patients' discomfort in talking about death</li> <li>e) Patients wish to entrust decision-making to the family</li> <li>f) Patients' wish to entrust decision-making to the physician</li> <li>g) Patients' lack of understanding/denial of their prognosis</li> </ul> | <ul style="list-style-type: none"> <li>a) 65%</li> <li>b) 30%</li> <li>c) 44%</li> <li>d) 30%</li> <li>e) 44%</li> <li>f) 35%</li> <li>g) 14%</li> </ul> |

|   |                       |      |             |                                     |                                                                                                                                                                                                                                                                                                                                                                                              |                                                |
|---|-----------------------|------|-------------|-------------------------------------|----------------------------------------------------------------------------------------------------------------------------------------------------------------------------------------------------------------------------------------------------------------------------------------------------------------------------------------------------------------------------------------------|------------------------------------------------|
| 7 | Park HY <sup>33</sup> | 2019 | South Korea | Patients with cancer (any stage)    | a) Patients' belief that they may change their mind in the future when facing the real situation<br>b) Patients belief that ACP would cause psychological discomfort<br>c) Patients' belief that their wish would not be respected<br>d) Patients' belief that they have a lack of understanding about AD<br>e) Patients' belief that the family will make the best decision on their behalf | a) 22%<br>b) 22%<br>c) 21%<br>d) 13%<br>e) 12% |
| 8 | Kim JW <sup>28</sup>  | 2020 | South Korea | Patients with advanced solid cancer | a) Patients' belief that they need to further discuss with the family<br>b) Patients' belief that they require more time prior to completion of ACP documentation<br>c) Patients' belief it is too early for ACP<br>d) Patients' belief that they have a lack of understanding of local policy                                                                                               | a) 38%<br>b) 28%<br>c) 21%<br>d) 17%           |

53 ACP: advance care planning; AD: advance directive.

54

## 55 Appendix 8. Motives for patients' willingness or unwillingness to engage in advance care planning (Qualitative data)

| No | Motives for patient's willingness to engage in ACP                  | Related findings or quotes                                                                                                                                                                                                                  | Number of studies (References) |
|----|---------------------------------------------------------------------|---------------------------------------------------------------------------------------------------------------------------------------------------------------------------------------------------------------------------------------------|--------------------------------|
| 1. | Patients' belief that ACP would promote autonomy                    | <i>"I want to manage my life on my own until the end"</i>                                                                                                                                                                                   | 5 (25, 42, 44, 57, 58)         |
| 2. | Patients' wish to have comfort near the end of their life           | <i>"Don't wake me up when I die. Just imagine when you wake up, you might find yourself paralyze. What's the point of living when paralyzed? You're only surviving for your friends and love ones. I don't want that, that's suffering"</i> | 3 (40, 57, 58)                 |
| 3. | Patients' wish to avoid being a burden to their family              | <i>"If I develop severe dementia, I would like to be institutionalized to avoid becoming a burden on my wife"</i>                                                                                                                           | 4 (25, 42, 44, 57)             |
| 4. | Patients' belief that ACP would create a connection with the family | Patients thought they could get closer to their families, made it easier for their caregivers to look after them, and gave them the opportunity to fulfill their wishes                                                                     | 1 (42)                         |
| 5. | Patients' experience with ACP                                       | <i>"Finally ... it is a form of relief. At last, I can speak up openly. Thank you for giving me this chance. I suppose it was not that hard to open up about this topic. I want to find some time to discuss this with my family"</i>       | 2 (45, 58)                     |
| No | Motives for patient's unwillingness to engage in ACP                | Related findings or quotes                                                                                                                                                                                                                  | Number of studies (References) |

|    |                                                                                                 |                                                                                                                                                                                                                                                                                                                                                                                                                                                                                                    |                           |
|----|-------------------------------------------------------------------------------------------------|----------------------------------------------------------------------------------------------------------------------------------------------------------------------------------------------------------------------------------------------------------------------------------------------------------------------------------------------------------------------------------------------------------------------------------------------------------------------------------------------------|---------------------------|
| 1. | Patients' lack of illness understanding                                                         | The majority of them did not seem to understand the gravity or seriousness of their illness. For instance, a fairly educated gentleman with severe chronic obstructive airway disease, who was recently admitted to the high dependency unit, stated that he was very hopeful and very optimistic of making a complete recovery                                                                                                                                                                    | 4 (25, 36, 44, 57)        |
| 2. | Incomplete understanding/lack of awareness regarding ACP                                        | Lack of awareness of early discussion A patient believed that she could not participate in ACP discussion, because she would not be able to do so at the end-of-life stage<br><br><i>"At that moment (end of life) I am already...how can I make a decision? I will leave it to my family for sure"</i>                                                                                                                                                                                            | 8 (41-44, 48, 50, 57, 58) |
| 3. | Patients' lack of understanding of ACP relevance for planning beyond financial arrangements     | Patients who claimed to "have no property" to plan for and only "relied on children's monthly contribution" for their living expenses also did not complete advance care plans as they failed to appreciate the need for ACP beyond financial concerns<br><br>Patient (53) thought that <i>"it is important to complete ACP but thinks he does not have much assets to worry"</i> , while patient (51) reported that <i>"she has little property and finances, so no immediate need [for ACP]"</i> | 2 (43, 44)                |
| 4. | Patient's concern that they would feel uncomfortable discussing end-of-life issues/loss of hope | Patients were concerned that discussions about end-of-life matters may cause them to become sad or fearful<br><br><i>"When I was healthy, I sometimes thought about it, but I don't think it is necessary, and I feel sad.... I just don't want to talk about it ever since I became sick"</i>                                                                                                                                                                                                     | 3 (29, 41, 42)            |
| 5. | Patients' concern that ACP would cause distress for family members                              | Patients were concerned that the ACP may burden family members who had problems of their own to manage<br><br><i>"Death is just death...why should I worry right now? If I talk to my family about end-of-life care...it will seem that I am threatening my family and making them feel sorrow...I don't want to do this"</i>                                                                                                                                                                      | 5 (41, 42, 48, 50, 58)    |
| 6. | Patients' concern that ACP would cause conflict within their family members                     | Patient (3) shared that "she is wary about doing (advance directive) as she is worried that it will cause conflict between her two sons", whereas patient (75)                                                                                                                                                                                                                                                                                                                                     | 3 (44, 50, 58)            |



|                                                                                       |                                                                                                                                                                                                                                                                                                                                                                                                                                                                                                                                                                                                                                         |                             |
|---------------------------------------------------------------------------------------|-----------------------------------------------------------------------------------------------------------------------------------------------------------------------------------------------------------------------------------------------------------------------------------------------------------------------------------------------------------------------------------------------------------------------------------------------------------------------------------------------------------------------------------------------------------------------------------------------------------------------------------------|-----------------------------|
|                                                                                       | expressed “she does not want her children to be unhappy that she is ‘playing favorites’ by appointing certain children as ‘done’”                                                                                                                                                                                                                                                                                                                                                                                                                                                                                                       |                             |
| 7. Patient’s belief that discussing end-of-life would bring bad luck ( <i>taboo</i> ) | Not wanting to cause problems, no participant wanted to discuss death or end-of-life care with family. Most of the participants and their children believed that discussing end-of-life-care-related concerns would bring them bad luck<br><br><i>“No, [frown] in fact this kind of issue (end-of-life planning) shouldn’t be discussed openly as it is a taboo subject and not something we can discuss openly. I can’t tell you why, but like I said just now, you can’t simply open-up and discuss this thing. You might not know, something bad might happen after the discussion”</i>                                              | 2 ( <sup>50, 58</sup> )     |
| 8. Patients inability to appreciate what intent of ACP                                | <i>“It is unnecessary and ridiculous for me to think about whether to receive CPR or not...or...what kind of care I want to have at the end of life right now...the only thing I want to do right now is to live here happily and smoothly”</i>                                                                                                                                                                                                                                                                                                                                                                                         | 2 ( <sup>43, 50</sup> )     |
| 9. Patients’ doubted the effectiveness of ACP in conveying their wishes               | Patient (54) reported he was “not keen to consider ACP as he has reservations and lack of trust over wife and children’s abilities to follow his wishes”                                                                                                                                                                                                                                                                                                                                                                                                                                                                                | 1 ( <sup>44</sup> )         |
| 10. Patients’ belief that HCPs do not advocate ACP                                    | <i>“The consultant told me if I received the treatment then my life could be extended for 2 months. If not, my life would be shortened for 2 months ... At that time, I didn’t want to receive (the treatment). But eventually I received the treatment three times. Later, he said I could continue to undergo the treatment. The more treatments I received, the more sluggish I was. I asked whether I could quit. The consultant questioned me, “Really?” ... And in the next consultation, the doctor told me, I could keep receiving treatment in view of my condition ... He asked ‘How about getting the treatment again?’”</i> | 2 ( <sup>41, 43</sup> )     |
| 11. Patients’ belief that family does not support their engagement in ACP             | <i>“In my experience, you are concerned mainly about your family’s opinions [when you make a decision] rather than your own opinions at the end of life. (PT15: 57 y/o lung cancer female)”</i>                                                                                                                                                                                                                                                                                                                                                                                                                                         | 3 ( <sup>43, 44, 47</sup> ) |
| 12. Patients’ wish to seek harmony with the mandate of nature                         | Furthermore, they expressed that death is a natural event and that a human must seek harmony with nature rather than try to change it<br><br><i>“I don’t want to think or talk too much about end-of-life care...just let it happen naturally...everything must follow the mandate of nature... just as that</i>                                                                                                                                                                                                                                                                                                                        | 1 ( <sup>50</sup> )         |

|                                                                                              |                                                                                                                                                                                                                                                                                                                                                                                                      |                               |
|----------------------------------------------------------------------------------------------|------------------------------------------------------------------------------------------------------------------------------------------------------------------------------------------------------------------------------------------------------------------------------------------------------------------------------------------------------------------------------------------------------|-------------------------------|
|                                                                                              | <i>tree outside the window accepts its situation from nature without questioning”</i>                                                                                                                                                                                                                                                                                                                |                               |
| 13. Patients’ belief in providence                                                           | <i>“Let me tell you...when you will die and how to die... these things have been decided already by what you have done in present and past lives...it is really complex...we may never be able to understand the language of providence”</i>                                                                                                                                                         | 7 (41, 44, 48, 50, 57, 58)    |
| 14. Patients’ concern that their decisions may change in the future                          | <i>“I don’t want to discuss or decide in advance because nobody knows what will happen in the future. New treatment could be introduced in the future, and I may change my mind even....”</i>                                                                                                                                                                                                        | 2 (29, 42)                    |
| 15. Patients’ concern of difficulty in planning for the unknown/unpredictable disease course | <i>“I have no idea about things related to end-of-life care or signing DNR papers...they are too complex for me to make decisions by myself without their [my children’s] permission...so, please ask my children...they are smarter than I am, and they can make any decision for me by themselves”</i>                                                                                             | 4 (25, 41, 45, 50)            |
| 16. Patients considered ACP irrelevant due to their socioeconomic dependency                 | She leaves long-term planning to her niece’s family as she does not have the resources to plan for herself and trusts them to make plans for her                                                                                                                                                                                                                                                     | 4 (25, 43, 44, 58)            |
| 17. Patients’ belief of limited options available for them in the future care                | <i>“I think I would have no choice but to be institutionalized in the future, just as my sister was”</i>                                                                                                                                                                                                                                                                                             | 1 (25)                        |
| 18. Patients’ belief that limited care continuity hampers ACP                                | Under the healthcare system of Hong Kong, patients usually are seen by different doctors across visits in the same clinical settings. They could hardly develop a long term relationship and have continual communication with the same doctors. This might also prevent continual ACP discussion<br><i>“Consultations are delivered by different doctors. It is not the same person every time”</i> | 1 (41)                        |
| 19. Patients’ belief that time constraint from HCPs side hampers ACP                         | <i>“I want to know the diagnosis and prognosis. I want to know what will happen if the condition keeps worsening. But doctors (in acute setting) were really too busy. He (doctor) talked with me in the corridor. That’s depressing.”</i>                                                                                                                                                           | 1 (41)                        |
| 20. Patients’ belief that HCPs lack the communication skills and empathy for ACP             | <i>“A doctor yelled “if you don’t receive the treatment you will die” (in an oncology inpatient setting). From the perspective of patients, such words will make us feel down. So I think doctors, I don’t know the reasons, but I think as a professional, the best way to communicate is not to say those words to a person in need ... Sometimes their words are discouraging.”</i>               | 1 (41)                        |
| 21. Patients’ wish to entrust decision-making to family members                              | <i>“Ideally, these end-of-life decisions should be left with your family, because they know your wishes and can fulfil them in the way you want when your life</i>                                                                                                                                                                                                                                   | 9 (25, 36, 41-44, 50, 57, 58) |

*ends. [Laugh] Die in your own way ... You see, we can prepare and cope with the cycle of life, from birth, growing old and sickness, but when it comes to death how many of us are able to die in our own way? [Frown] No ... your body might belong to you, but how you die and what happens next is for others, especially your family”*

- |     |                                                               |                                                                                                                                                                                                                                                                                      |                    |
|-----|---------------------------------------------------------------|--------------------------------------------------------------------------------------------------------------------------------------------------------------------------------------------------------------------------------------------------------------------------------------|--------------------|
| 22. | Patients’ belief that the physicians would “do what is right” | <i>“Doctors are professionals...if doctors think I can’t be saved...just let me die soon...if doctors think I will have the chance to live longer...let me have CPR...I have told my children that they need to trust doctors’ ability and follow their orders without question”</i> | 4 (41, 50, 57, 58) |
| 23. | Patients’ belief that informal planning would suffice         | <i>“I already talked to my children about how I want to be treated and to spend the rest of my life.”</i>                                                                                                                                                                            | 3 (29, 44, 57)     |
| 24. | Patients’ belief that it is too early to engage in ACP        | <i>“Because...I am healthy presently and too young to think about issues related to death or end-of-life care... would you please not talk about these issues until I am more than 70 years old?”</i>                                                                                | 2 (25, 50)         |

---

56 ACP: advance care planning; CPR: cardiopulmonary resuscitation; DNR: do-not-resuscitate; HCPs: healthcare professionals.

57

58

59

60
